# Supplementary material for: Mirror stimulation in Eurasian jays (Garrulus glandarius)
Source: PeerJ. 2023 Feb 15;11:e14729. doi: 10.7717/peerj.14729 (PMC9938653; doi:10.7717/peerj.14729)
Supplement: Supplemental Information 1 [file peerj-11-14729-s001.xlsx]

## Sheet: README
ID	Numeric value attribuited to the birds
Name	Name of the bird tested
Aviary	Social group that each bird belonged to
Sex	Male or Female
Date	Date of testing
Session	Number of sessions performed
Order	Initial position (Right or Left) of the mirror
SideMirror	Position of the mirror across sessions
Condition	Mirror or Wooden panel
Food Taken	Number of food item taken
Duration of Looking	Duration (sec) of looking at either mirror or wood panel
Occurrence of Looking	Frequencies of looking at either mirror or wood panel
Social Behaviour	Aggressive: occurrence of fluffing feathers, wing waving and jumps towards the mirror or wooden panel
Contingent	Occurrence of repetitive movement of the head (e.g. left/right or up/down) when in front of the mirror or wooden panel
Self-directed	Preening: duration of preening when the beak grooms parts of the body when facing the mirror or the cardboard.
VM	Vertical mirror configuration
HM	Horizontal mirror configuration
VW	Vertical wooden configuration
HW	Horizontal wooden configuration
VMirror	Average latency on vertical mirror configuration
HMirror	Average latency on horizontal mirror configuration
Vnmirror	Average latency on vertical wooden configuration
HNmirror	Average latency on horizontal wooden configuration
SVMirror	Number of sessions carried out on vertical mirror configuration
SHMirror	Number of sessions carried out on horizontal mirror configuration
SVNmirror	Number of sessions carried out on vertical wooden configuration
SHNmirror	Number of sessions carried out on horizontal wooden configuration

## Sheet: Test1
ID	Name	Aviary	Sex	Date	Session	Order	SideMirror	Condition	Food Taken	Duration of Looking	Occurrence of Looking	Social Behaviour	Contingent	Self-directed
1	Romeo	1	Male	2019-05-07	1	Right	Right	Mirror	0	0	0	0	0	0
1	Romeo	1	Male	2019-05-08	2	Right	Left	Mirror	0	0.26	1	0	0	0
1	Romeo	1	Male	2019-05-09	3	Right	Right	Mirror	0	5.8	3	0	0	0
1	Romeo	1	Male	2019-05-10	4	Right	Left	Mirror	6	201.31	13	1	17	0
1	Romeo	1	Male	2019-05-13	5	Right	Right	Mirror	0	0	0	0	0	0
1	Romeo	1	Male	2019-05-16	6	Right	Left	Mirror	0	6.25	1	0	0	0
1	Romeo	1	Male	2019-05-17	7	Right	Right	Mirror	0	11.56	4	0	0	0
1	Romeo	1	Male	2019-05-20	8	Right	Left	Mirror	5	52.45	6	0	0	0
1	Romeo	1	Male	2019-05-20	9	Right	Right	Mirror	0	0	0	0	0	0
1	Romeo	1	Male	2019-05-22	10	Right	Left	Mirror	2	25.21	2	0	0	0
1	Romeo	1	Male	2019-05-23	11	Right	Right	Mirror	0	0	0	0	0	0
1	Romeo	1	Male	2019-05-24	12	Right	Left	Mirror	1	6.25	2	0	0	0
1	Romeo	1	Male	2019-05-28	13	Right	Right	Mirror	0	0	0	0	0	0
1	Romeo	1	Male	2019-05-29	14	Right	Left	Mirror	1	23.75	3	0	0	0
1	Romeo	1	Male	2019-05-30	15	Right	Right	Mirror	0	0	0	0	0	0
1	Romeo	1	Male	2019-05-31	16	Right	Left	Mirror	1	24.24	3	0	0	0
1	Romeo	1	Male	2019-05-07	1	Right	Right	Wooden panel	0	7.79	3	0	0	0
1	Romeo	1	Male	2019-05-08	2	Right	Left	Wooden panel	0	0	0	0	0	0
1	Romeo	1	Male	2019-05-09	3	Right	Right	Wooden panel	0	16.27	2	0	0	0
1	Romeo	1	Male	2019-05-10	4	Right	Left	Wooden panel	1	11.22	2	0	0	0
1	Romeo	1	Male	2019-05-13	5	Right	Right	Wooden panel	0	0	0	0	0	0
1	Romeo	1	Male	2019-05-16	6	Right	Left	Wooden panel	0	0	0	0	0	0
1	Romeo	1	Male	2019-05-17	7	Right	Right	Wooden panel	9	54.96	10	0	0	0
1	Romeo	1	Male	2019-05-20	8	Right	Left	Wooden panel	0	0	0	0	0	0
1	Romeo	1	Male	2019-05-20	9	Right	Right	Wooden panel	7	45.03	8	0	0	0
1	Romeo	1	Male	2019-05-22	10	Right	Left	Wooden panel	3	24.22	4	0	0	0
1	Romeo	1	Male	2019-05-23	11	Right	Right	Wooden panel	4	38.5	4	0	0	0
1	Romeo	1	Male	2019-05-24	12	Right	Left	Wooden panel	1	11.04	2	0	0	0
1	Romeo	1	Male	2019-05-28	13	Right	Right	Wooden panel	6	32.13	5	0	0	0
1	Romeo	1	Male	2019-05-29	14	Right	Left	Wooden panel	0	1.25	1	0	0	0
1	Romeo	1	Male	2019-05-30	15	Right	Right	Wooden panel	1	7.73	2	0	0	0
1	Romeo	1	Male	2019-05-31	16	Right	Left	Wooden panel	0	0	0	0	0	0
2	Hoy	1	Male	2019-05-07	1	Left	Left	Mirror	0	32.52	2	0	0	0
2	Hoy	1	Male	2019-05-08	2	Left	Right	Mirror	0	6.83	2	0	0	0
2	Hoy	1	Male	2019-05-09	3	Left	Left	Mirror	0	8.49	1	0	2	0
2	Hoy	1	Male	2019-05-10	4	Left	Right	Mirror	0	3.55	1	0	0	0
2	Hoy	1	Male	2019-05-13	5	Left	Left	Mirror	0	0	0	0	0	0
2	Hoy	1	Male	2019-05-16	6	Left	Right	Mirror	0	1.19	1	0	0	0
2	Hoy	1	Male	2019-05-17	7	Left	Left	Mirror	0	31.81	5	0	2	0
2	Hoy	1	Male	2019-05-20	8	Left	Right	Mirror	0	2.5	1	0	0	0
2	Hoy	1	Male	2019-05-21	9	Left	Left	Mirror	0	34.13	6	0	0	0
2	Hoy	1	Male	2019-05-22	10	Left	Right	Mirror	0	0	0	0	0	0
2	Hoy	1	Male	2019-05-23	11	Left	Left	Mirror	0	0	0	0	0	0
2	Hoy	1	Male	2019-05-24	12	Left	Right	Mirror	0	0	0	0	0	0
2	Hoy	1	Male	2019-05-28	13	Left	Left	Mirror	0	0	0	0	0	0
2	Hoy	1	Male	2019-05-29	14	Left	Right	Mirror	0	0	0	0	0	0
2	Hoy	1	Male	2019-05-30	15	Left	Left	Mirror	0	2.5	2	0	0	0
2	Hoy	1	Male	2019-05-31	16	Left	Right	Mirror	0	10.28	1	0	0	0
2	Hoy	1	Male	2019-05-07	1	Left	Left	Wooden panel	0	18.75	3	0	0	0
2	Hoy	1	Male	2019-05-08	2	Left	Right	Wooden panel	0	0	0	0	0	0
2	Hoy	1	Male	2019-05-09	3	Left	Left	Wooden panel	0	0	0	0	0	0
2	Hoy	1	Male	2019-05-10	4	Left	Right	Wooden panel	0	0	0	0	0	0
2	Hoy	1	Male	2019-05-13	5	Left	Left	Wooden panel	0	0	0	0	0	0
2	Hoy	1	Male	2019-05-16	6	Left	Right	Wooden panel	0	0	0	0	0	0
2	Hoy	1	Male	2019-05-17	7	Left	Left	Wooden panel	0	12.79	1	0	0	0
2	Hoy	1	Male	2019-05-20	8	Left	Right	Wooden panel	5	49.84	7	0	0	0
2	Hoy	1	Male	2019-05-21	9	Left	Left	Wooden panel	6	0	0	0	0	0
2	Hoy	1	Male	2019-05-22	10	Left	Right	Wooden panel	0	2.75	1	0	0	0
2	Hoy	1	Male	2019-05-23	11	Left	Left	Wooden panel	0	0	0	0	0	0
2	Hoy	1	Male	2019-05-24	12	Left	Right	Wooden panel	0	0	0	0	0	0
2	Hoy	1	Male	2019-05-28	13	Left	Left	Wooden panel	0	0	0	0	0	0
2	Hoy	1	Male	2019-05-29	14	Left	Right	Wooden panel	0	0	0	0	0	0
2	Hoy	1	Male	2019-05-30	15	Left	Left	Wooden panel	0	0	0	0	0	0
2	Hoy	1	Male	2019-05-31	16	Left	Right	Wooden panel	2	11.66	2	0	0	0
3	Lima	2	Male	2019-05-07	1	Left	Left	Mirror	0	10.54	3	0	0	0
3	Lima	2	Male	2019-05-08	2	Left	Right	Mirror	0	0	0	0	0	0
3	Lima	2	Male	2019-05-10	3	Left	Left	Mirror	0	0.99	1	0	0	0
3	Lima	2	Male	2019-05-13	4	Left	Right	Mirror	0	0	0	0	0	0
3	Lima	2	Male	2019-05-16	5	Left	Left	Mirror	0	0	0	0	0	0
3	Lima	2	Male	2019-05-17	6	Left	Right	Mirror	0	0.99	1	0	0	0
3	Lima	2	Male	2019-05-20	7	Left	Left	Mirror	0	1.65	1	0	0	0
3	Lima	2	Male	2019-05-21	8	Left	Right	Mirror	0	13.49	1	0	0	0
3	Lima	2	Male	2019-05-22	9	Left	Left	Mirror	0	2.26	2	0	0	0
3	Lima	2	Male	2019-05-23	10	Left	Right	Mirror	0	18.56	2	0	0	0
3	Lima	2	Male	2019-05-24	11	Left	Left	Mirror	0	0	0	0	0	0
3	Lima	2	Male	2019-05-28	12	Left	Right	Mirror	0	3.25	3	0	0	0
3	Lima	2	Male	2019-05-29	13	Left	Left	Mirror	0	2	2	0	0	0
3	Lima	2	Male	2019-05-30	14	Left	Right	Mirror	0	1.49	1	0	0	0
3	Lima	2	Male	2019-05-31	15	Left	Left	Mirror	0	10.49	1	0	0	0
3	Lima	2	Male	2019-06-03	16	Left	Right	Mirror	0	0	0	0	0	0
3	Lima	2	Male	2019-05-07	1	Left	Left	Wooden panel	0	0	0	0	0	0
3	Lima	2	Male	2019-05-08	2	Left	Right	Wooden panel	0	0	0	0	0	0
3	Lima	2	Male	2019-05-10	3	Left	Left	Wooden panel	0	0	0	0	0	0
3	Lima	2	Male	2019-05-13	4	Left	Right	Wooden panel	0	0	0	0	0	0
3	Lima	2	Male	2019-05-16	5	Left	Left	Wooden panel	0	0	0	0	0	0
3	Lima	2	Male	2019-05-17	6	Left	Right	Wooden panel	0	0	0	0	0	0
3	Lima	2	Male	2019-05-20	7	Left	Left	Wooden panel	0	2.48	1	0	0	0
3	Lima	2	Male	2019-05-21	8	Left	Right	Wooden panel	0	0	0	0	0	0
3	Lima	2	Male	2019-05-22	9	Left	Left	Wooden panel	5	35.51	4	0	0	0
3	Lima	2	Male	2019-05-23	10	Left	Right	Wooden panel	0	0	0	0	0	0
3	Lima	2	Male	2019-05-24	11	Left	Left	Wooden panel	0	0	0	0	0	0
3	Lima	2	Male	2019-05-28	12	Left	Right	Wooden panel	0	0	0	0	0	0
3	Lima	2	Male	2019-05-29	13	Left	Left	Wooden panel	6	25.2	6	0	0	0
3	Lima	2	Male	2019-05-30	14	Left	Right	Wooden panel	0	0	0	0	0	0
3	Lima	2	Male	2019-05-31	15	Left	Left	Wooden panel	7	221.03	10	0	0	0
3	Lima	2	Male	2019-06-03	16	Left	Right	Wooden panel	3	44.72	4	0	0	0
4	Washington	2	Female	2019-05-08	1	Left	Left	Mirror	0	0.38	1	0	0	0
4	Washington	2	Female	2019-05-13	2	Left	Right	Mirror	0	1.24	1	0	0	0
4	Washington	2	Female	2019-05-16	3	Left	Left	Mirror	0	20.17	5	0	0	0
4	Washington	2	Female	2019-05-17	4	Left	Right	Mirror	0	3.98	3	0	0	0
4	Washington	2	Female	2017-05-20	5	Left	Left	Mirror	0	2.99	4	0	0	0
4	Washington	2	Female	2019-05-21	6	Left	Right	Mirror	0	1.5	2	0	0	0
4	Washington	2	Female	2019-05-22	7	Left	Left	Mirror	1	7.99	3	0	0	0
4	Washington	2	Female	2019-05-23	8	Left	Right	Mirror	0	0	0	0	0	0
4	Washington	2	Female	2019-05-24	9	Left	Left	Mirror	0	0	0	0	0	0
4	Washington	2	Female	2019-05-28	10	Left	Right	Mirror	0	0	0	0	0	0
4	Washington	2	Female	2019-05-29	11	Left	Left	Mirror	0	46.05	7	0	0	0
4	Washington	2	Female	2019-05-30	12	Left	Right	Mirror	0	1.5	3	0	0	0
4	Washington	2	Female	2019-05-31	13	Left	Left	Mirror	2	33.69	8	0	0	0
4	Washington	2	Female	2019-06-03	14	Left	Right	Mirror	0	0	0	0	0	0
4	Washington	2	Female	2019-06-04	15	Left	Left	Mirror	0	0	0	0	0	0
4	Washington	2	Female	2019-06-05	16	Left	Right	Mirror	0	0	0	0	0	0
4	Washington	2	Female	2019-05-08	1	Left	Left	Wooden panel	0	0.25	1	0	0	0
4	Washington	2	Female	2019-05-13	2	Left	Right	Wooden panel	1	10.24	2	0	0	0
4	Washington	2	Female	2019-05-16	3	Left	Left	Wooden panel	0	5	1	0	0	0
4	Washington	2	Female	2019-05-17	4	Left	Right	Wooden panel	1	6.05	3	0	0	0
4	Washington	2	Female	2017-05-20	5	Left	Left	Wooden panel	0	0	0	0	0	0
4	Washington	2	Female	2019-05-21	6	Left	Right	Wooden panel	1	14.75	2	0	0	0
4	Washington	2	Female	2019-05-22	7	Left	Left	Wooden panel	0	0	0	0	0	0
4	Washington	2	Female	2019-05-23	8	Left	Right	Wooden panel	0	0	0	0	0	0
4	Washington	2	Female	2019-05-24	9	Left	Left	Wooden panel	0	0	0	0	0	0
4	Washington	2	Female	2019-05-28	10	Left	Right	Wooden panel	0	1.24	1	0	0	0
4	Washington	2	Female	2019-05-29	11	Left	Left	Wooden panel	0	8.36	4	0	0	0
4	Washington	2	Female	2019-05-30	12	Left	Right	Wooden panel	1	13.25	3	0	0	0
4	Washington	2	Female	2019-05-31	13	Left	Left	Wooden panel	0	13.27	1	0	0	0
4	Washington	2	Female	2019-06-03	14	Left	Right	Wooden panel	0	0	0	0	0	0
4	Washington	2	Female	2019-06-04	15	Left	Left	Wooden panel	0	0	0	0	0	0
4	Washington	2	Female	2019-05-06	16	Left	Right	Wooden panel	0	0	0	0	0	0
5	Caracas	2	Male	2019-05-08	1	Right	Right	Mirror	0	9.22	5	4	0	0
5	Caracas	2	Male	2019-05-09	2	Right	Left	Mirror	0	5.99	3	0	0	0
5	Caracas	2	Male	2019-05-10	3	Right	Left	Mirror	0	0	0	0	0	0
5	Caracas	2	Male	2019-05-13	4	Right	Right	Mirror	0	0.5	1	0	0	0
5	Caracas	2	Male	2019-05-16	5	Right	Right	Mirror	0	0	0	0	0	0
5	Caracas	2	Male	2019-05-17	6	Right	Left	Mirror	0	0	0	0	0	0
5	Caracas	2	Male	2019-05-20	7	Right	Right	Mirror	0	5.83	5	0	0	0
5	Caracas	2	Male	2019-05-21	8	Right	Left	Mirror	1	11.71	9	0	0	0
5	Caracas	2	Male	2019-05-22	9	Right	Right	Mirror	0	12.49	7	0	0	0
5	Caracas	2	Male	2019-05-23	10	Right	Left	Mirror	0	28.44	14	0	0	0
5	Caracas	2	Male	2019-05-24	11	Right	Right	Mirror	0	24.96	5	0	0	0
5	Caracas	2	Male	2019-05-28	12	Right	Left	Mirror	0	6.45	5	0	0	0
5	Caracas	2	Male	2019-05-29	13	Right	Right	Mirror	0	2.49	3	0	0	0
5	Caracas	2	Male	2019-05-30	14	Right	Left	Mirror	0	13.22	7	0	0	0
5	Caracas	2	Male	2019-05-31	15	Right	Right	Mirror	0	27.04	10	0	0	0
5	Caracas	2	Male	2019-06-03	16	Right	Left	Mirror	0	20.74	10	0	0	0
5	Caracas	2	Male	2019-05-08	1	Right	Right	Wooden panel	2	38.55	12	0	0	0
5	Caracas	2	Male	2019-05-09	2	Right	Left	Wooden panel	0	0	0	0	0	0
5	Caracas	2	Male	2019-05-10	3	Right	Right	Wooden panel	0	0	0	0	0	0
5	Caracas	2	Male	2019-05-13	4	Right	Left	Wooden panel	0	0	0	0	0	0
5	Caracas	2	Male	2019-05-16	5	Right	Right	Wooden panel	0	0	0	0	0	0
5	Caracas	2	Male	2019-05-17	6	Right	Left	Wooden panel	0	0	0	0	0	0
5	Caracas	2	Male	2019-05-20	7	Right	Right	Wooden panel	0	0	0	0	0	0
5	Caracas	2	Male	2019-05-21	8	Right	Left	Wooden panel	0	16.98	5	0	0	0
5	Caracas	2	Male	2019-05-22	9	Right	Right	Wooden panel	1	11.24	4	0	0	0
5	Caracas	2	Male	2019-05-23	10	Right	Left	Wooden panel	1	8.22	2	0	0	0
5	Caracas	2	Male	2019-05-24	11	Right	Right	Wooden panel	0	5.45	2	0	0	0
5	Caracas	2	Male	2019-05-28	12	Right	Left	Wooden panel	5	87.24	10	0	0	0
5	Caracas	2	Male	2019-05-29	13	Right	Right	Wooden panel	0	23.16	6	0	0	0
5	Caracas	2	Male	2019-05-30	14	Right	Left	Wooden panel	2	63.07	12	0	0	0
5	Caracas	2	Male	2019-05-31	15	Right	Right	Wooden panel	1	63.59	15	0	0	0
5	Caracas	2	Male	2019-06-03	16	Right	Left	Wooden panel	0	69.47	17	0	0	0
6	Wellington	2	Female	2019-05-08	1	Right	Right	Mirror	0	0	0	0	0	0
6	Wellington	2	Female	2019-05-09	2	Right	Left	Mirror	0	0.24	1	0	0	0
6	Wellington	2	Female	2019-05-10	3	Right	Left	Mirror	0	105.89	6	0	0	0
6	Wellington	2	Female	2019-05-13	4	Right	Right	Mirror	0	0.49	1	0	0	0
6	Wellington	2	Female	2019-05-16	5	Right	Right	Mirror	0	0	0	0	0	0
6	Wellington	2	Female	2019-05-17	6	Right	Left	Mirror	0	0	0	0	0	0
6	Wellington	2	Female	2019-05-20	7	Right	Right	Mirror	0	0	0	0	0	0
6	Wellington	2	Female	2019-05-21	8	Right	Left	Mirror	0	0	0	0	0	0
6	Wellington	2	Female	2019-05-22	9	Right	Right	Mirror	0	0	0	0	0	0
6	Wellington	2	Female	2019-05-23	10	Right	Left	Mirror	0	0	0	0	0	0
6	Wellington	2	Female	2019-05-24	11	Right	Right	Mirror	0	0	0	0	0	0
6	Wellington	2	Female	2019-05-28	12	Right	Left	Mirror	0	0	0	0	0	0
6	Wellington	2	Female	2019-05-29	13	Right	Right	Mirror	0	0	0	0	0	0
6	Wellington	2	Female	2019-05-30	14	Right	Left	Mirror	0	0	0	0	0	0
6	Wellington	2	Female	2019-05-31	15	Right	Right	Mirror	0	0	0	0	0	0
6	Wellington	2	Female	2019-06-03	16	Right	Left	Mirror	0	0	0	0	0	0
6	Wellington	2	Female	2019-05-08	1	Right	Right	Wooden panel	0	0	0	0	0	0
6	Wellington	2	Female	2019-05-09	2	Right	Left	Wooden panel	0	0	0	0	0	0
6	Wellington	2	Female	2019-05-10	3	Right	Left	Wooden panel	1	17.49	3	0	0	0
6	Wellington	2	Female	2019-05-13	4	Right	Right	Wooden panel	0	0	0	0	0	0
6	Wellington	2	Female	2019-05-16	5	Right	Right	Wooden panel	0	0	0	0	0	0
6	Wellington	2	Female	2019-05-17	6	Right	Left	Wooden panel	0	0	0	0	0	0
6	Wellington	2	Female	2019-05-20	7	Right	Right	Wooden panel	0	0	0	0	0	0
6	Wellington	2	Female	2019-05-21	8	Right	Left	Wooden panel	0	0	0	0	0	0
6	Wellington	2	Female	2019-05-22	9	Right	Right	Wooden panel	0	0	0	0	0	0
6	Wellington	2	Female	2019-05-23	10	Right	Left	Wooden panel	0	0	0	0	0	0
6	Wellington	2	Female	2019-05-24	11	Right	Right	Wooden panel	0	0	0	0	0	0
6	Wellington	2	Female	2019-05-28	12	Right	Left	Wooden panel	0	0	0	0	0	0
6	Wellington	2	Female	2019-05-29	13	Right	Right	Wooden panel	0	0	0	0	0	0
6	Wellington	2	Female	2019-05-30	14	Right	Left	Wooden panel	0	0	0	0	0	0
6	Wellington	2	Female	2019-05-31	15	Right	Right	Wooden panel	0	0	0	0	0	0
6	Wellington	2	Female	2019-06-03	16	Right	Left	Wooden panel	0	0	0	0	0	0
7	Hunter	1	Female	2019-05-16	1	Right	Right	Mirror	0	13.73	4	0	0	0
7	Hunter	1	Female	2019-05-17	2	Right	Left	Mirror	0	0.63	1	0	0	0
7	Hunter	1	Female	2017-05-20	3	Right	Right	Mirror	0	10.27	2	0	0	0
7	Hunter	1	Female	2019-05-21	4	Right	Left	Mirror	0	0.49	1	0	0	0
7	Hunter	1	Female	2019-05-22	5	Right	Right	Mirror	0	0.98	1	0	0	0
7	Hunter	1	Female	2019-05-23	6	Right	Left	Mirror	0	9.53	1	0	0	0
7	Hunter	1	Female	2019-05-24	7	Right	Right	Mirror	0	0	0	0	0	0
7	Hunter	1	Female	2019-05-28	8	Right	Left	Mirror	0	0	0	0	0	0
7	Hunter	1	Female	2019-05-29	9	Right	Right	Mirror	0	0	0	0	0	0
7	Hunter	1	Female	2019-05-30	10	Right	Left	Mirror	0	0	0	0	0	0
7	Hunter	1	Female	2019-05-31	11	Right	Right	Mirror	0	0	0	0	0	0
7	Hunter	1	Female	2019-06-03	12	Right	Left	Mirror	0	0	0	0	0	0
7	Hunter	1	Female	2019-06-04	13	Right	Right	Mirror	0	9.5	1	0	0	0
7	Hunter	1	Female	2019-06-05	14	Right	Left	Mirror	0	0.75	1	0	0	0
7	Hunter	1	Female	2019-06-06	15	Right	Right	Mirror	0	0	0	0	0	0
7	Hunter	1	Female	2019-06-12	16	Right	Left	Mirror	1	5.74	1	0	0	0
7	Hunter	1	Female	2019-05-16	1	Right	Right	Wooden panel	0	0.93	1	0	0	0
7	Hunter	1	Female	2019-05-17	2	Right	Left	Wooden panel	1	6.13	2	0	0	0
7	Hunter	1	Female	2017-05-20	3	Right	Right	Wooden panel	0	4.21	2	0	0	0
7	Hunter	1	Female	2019-05-21	4	Right	Left	Wooden panel	1	3.28	1	0	0	0
7	Hunter	1	Female	2019-05-22	5	Right	Right	Wooden panel	0	0	0	0	0	0
7	Hunter	1	Female	2019-05-23	6	Right	Left	Wooden panel	0	0	0	0	0	0
7	Hunter	1	Female	2019-05-24	7	Right	Right	Wooden panel	0	0	0	0	0	0
7	Hunter	1	Female	2019-05-28	8	Right	Left	Wooden panel	0	0	0	0	0	0
7	Hunter	1	Female	2019-05-29	9	Right	Right	Wooden panel	0	0	0	0	0	0
7	Hunter	1	Female	2019-05-30	10	Right	Left	Wooden panel	0	0	0	0	0	0
7	Hunter	1	Female	2019-05-31	11	Right	Right	Wooden panel	0	0	0	0	0	0
7	Hunter	1	Female	2019-06-03	12	Right	Left	Wooden panel	0	14	2	0	0	0
7	Hunter	1	Female	2019-06-04	13	Right	Right	Wooden panel	1	8.88	1	0	0	0
7	Hunter	1	Female	2019-06-05	14	Right	Left	Wooden panel	1	14.24	1	0	0	0
7	Hunter	1	Female	2019-06-06	15	Right	Right	Wooden panel	1	31.73	5	0	0	0
7	Hunter	1	Female	2019-06-12	16	Right	Left	Wooden panel	1	8.3	1	0	0	0

## Sheet: Test2
ID	Name	Aviary	Sex	Date	Session	Order	Side Mirror	Condition	Food taken (Binomial)	Duration of looking	Occurrence of looking	Social behaviour	Contingent	Self-directed
1	Romeo	1	Male	2019-06-25	1	Right	Right	Mirror	1	253.38	4	0	0	0
1	Romeo	1	Male	2019-06-26	2	Right	Left	Mirror	1	118.64	5	0	0	0
1	Romeo	1	Male	2019-06-27	3	Right	Right	Mirror	1	76.49	1	0	0	0
1	Romeo	1	Male	2019-06-28	4	Right	Left	Mirror	1	206.1	9	0	0	0
1	Romeo	1	Male	2019-07-01	5	Right	Right	Mirror	1	141.72	3	0	0	0
1	Romeo	1	Male	2019-07-02	6	Right	Left	Mirror	1	64.99	2	0	0	0
1	Romeo	1	Male	2019-07-03	7	Right	Right	Mirror	1	111.49	1	0	0	0
1	Romeo	1	Male	2019-07-04	8	Right	Left	Mirror	1	182.21	14	0	0	0
1	Romeo	1	Male	2019-06-25	1	Right	Right	Wooden panel	1	91.14	5	0	0	0
1	Romeo	1	Male	2019-06-26	2	Right	Left	Wooden panel	0	0	0	0	0	0
1	Romeo	1	Male	2019-06-27	3	Right	Right	Wooden panel	0	14.38	1	0	0	0
1	Romeo	1	Male	2019-06-28	4	Right	Left	Wooden panel	0	0	0	0	0	0
1	Romeo	1	Male	2019-07-01	5	Right	Right	Wooden panel	0	21.5	4	0	0	0
1	Romeo	1	Male	2019-07-02	6	Right	Left	Wooden panel	0	0	0	0	0	0
1	Romeo	1	Male	2019-07-03	7	Right	Right	Wooden panel	1	119	5	0	0	0
1	Romeo	1	Male	2019-07-04	8	Right	Left	Wooden panel	0	0	0	0	0	0
2	Hoy	1	Male	2019-06-25	1	Left	Left	Mirror	1	101.22	1	0	0	0
2	Hoy	1	Male	2019-06-26	2	Left	Right	Mirror	1	122.55	2	0	0	0
2	Hoy	1	Male	2019-06-27	3	Left	Left	Mirror	1	63.27	2	0	0	0
2	Hoy	1	Male	2019-06-28	4	Left	Right	Mirror	1	83.27	3	0	0	0
2	Hoy	1	Male	2019-04-01	5	Left	Left	Mirror	1	76.02	2	0	0	0
2	Hoy	1	Male	2019-07-02	6	Left	Right	Mirror	1	62.75	1	0	0	0
2	Hoy	1	Male	2019-10-02	7	Left	Left	Mirror	1	60.43	2	0	0	0
2	Hoy	1	Male	2020-01-02	8	Left	Right	Mirror	1	49.74	3	0	0	0
2	Hoy	1	Male	2019-06-25	1	Left	Left	Wooden panel	0	1.5	1	0	0	0
2	Hoy	1	Male	2019-06-26	2	Left	Right	Wooden panel	1	115.39	2	0	0	0
2	Hoy	1	Male	2019-06-27	3	Left	Left	Wooden panel	1	6.73	1	0	0	0
2	Hoy	1	Male	2019-06-28	4	Left	Right	Wooden panel	0	9.47	2	0	0	0
2	Hoy	1	Male	2019-04-01	5	Left	Left	Wooden panel	1	17.75	1	0	0	0
2	Hoy	1	Male	2019-07-02	6	Left	Right	Wooden panel	0	0	0	0	0	0
2	Hoy	1	Male	2019-10-02	7	Left	Left	Wooden panel	1	61.46	4	0	0	0
2	Hoy	1	Male	2020-01-02	8	Left	Right	Wooden panel	1	45.47	3	0	0	0
3	Lima	2	Male	2019-06-25	1	Left	Left	Mirror	1	204.96	4	0	1	0
3	Lima	2	Male	2019-06-26	2	Left	Right	Mirror	1	147.99	3	0	0	0
3	Lima	2	Male	2019-06-27	3	Left	Left	Mirror	1	165.99	1	0	0	0
3	Lima	2	Male	2019-06-28	4	Left	Right	Mirror	1	222.25	1	0	0	0
3	Lima	2	Male	2019-07-01	5	Left	Left	Mirror	1	112.24	1	0	0	0
3	Lima	2	Male	2019-07-02	6	Left	Right	Mirror	1	144.99	2	0	0	0
3	Lima	2	Male	2019-07-03	7	Left	Left	Mirror	1	137.5	1	0	0	0
3	Lima	2	Male	2019-07-04	8	Left	Right	Mirror	1	119.99	1	0	0	0
3	Lima	2	Male	2019-06-25	1	Left	Left	Wooden panel	0	35.96	4	0	0	0
3	Lima	2	Male	2019-06-26	2	Left	Right	Wooden panel	0	0	0	0	0	0
3	Lima	2	Male	2019-06-27	3	Left	Left	Wooden panel	0	7.5	1	0	0	0
3	Lima	2	Male	2019-06-28	4	Left	Right	Wooden panel	0	6.96	2	0	0	0
3	Lima	2	Male	2019-07-01	5	Left	Left	Wooden panel	0	10.5	2	0	0	0
3	Lima	2	Male	2019-07-02	6	Left	Right	Wooden panel	0	6.75	1	0	0	0
3	Lima	2	Male	2019-07-03	7	Left	Left	Wooden panel	0	0	0	0	0	0
3	Lima	2	Male	2019-07-04	8	Left	Right	Wooden panel	0	4.99	1	0	0	0
4	Washington	2	Female	2019-07-04	1	Right	Right	Mirror	1	114	13	0	0	0
4	Washington	2	Female	2019-07-05	2	Right	Left	Mirror	1	116.24	22	0	0	0
4	Washington	2	Female	2019-07-08	3	Right	Right	Mirror	1	101.74	8	0	0	0
4	Washington	2	Female	2019-07-09	4	Right	Left	Mirror	1	88.98	8	0	0	0
4	Washington	2	Female	2019-07-10	5	Right	Right	Mirror	1	72.24	4	0	0	0
4	Washington	2	Female	2019-07-11	6	Right	Left	Mirror	1	85.97	4	0	0	0
4	Washington	2	Female	2019-07-12	7	Right	Right	Mirror	1	64.51	1	0	0	0
4	Washington	2	Female	2019-07-12	8	Right	Left	Mirror	1	137.75	4	0	0	0
4	Washington	2	Female	2019-07-04	1	Right	Right	Wooden panel	0	2.5	2	0	0	0
4	Washington	2	Female	2019-07-05	2	Right	Left	Wooden panel	1	29.01	6	0	0	0
4	Washington	2	Female	2019-07-08	3	Right	Right	Wooden panel	0	0	0	0	0	0
4	Washington	2	Female	2019-07-09	4	Right	Left	Wooden panel	0	10.75	2	0	0	0
4	Washington	2	Female	2019-07-10	5	Right	Right	Wooden panel	0	0	0	0	0	0
4	Washington	2	Female	2019-07-11	6	Right	Left	Wooden panel	0	22.01	3	0	0	0
4	Washington	2	Female	2019-07-12	7	Right	Right	Wooden panel	0	0	0	0	0	0
4	Washington	2	Female	2019-07-12	8	Right	Left	Wooden panel	0	0	0	0	0	0
5	Caracas	2	Male	2019-06-25	1	Right	Right	Mirror	0	74.22	5	0	0	0
5	Caracas	2	Male	2019-06-26	2	Right	Left	Mirror	0	1.78	2	0	0	0
5	Caracas	2	Male	2019-06-27	3	Right	Right	Mirror	0	28.51	1	0	0	0
5	Caracas	2	Male	2019-06-28	4	Right	Left	Mirror	0	0.49	1	0	0	0
5	Caracas	2	Male	2019-07-01	5	Right	Right	Mirror	0	4.25	1	0	0	0
5	Caracas	2	Male	2019-07-02	6	Right	Left	Mirror	0	0	0	0	0	0
5	Caracas	2	Male	2019-07-03	7	Right	Right	Mirror	0	0	0	0	0	0
5	Caracas	2	Male	2019-07-04	8	Right	Left	Mirror	0	0	0	0	0	0
5	Caracas	2	Male	2019-06-25	1	Right	Right	Wooden panel	0	28.19	8	0	0	0
5	Caracas	2	Male	2019-06-26	2	Right	Left	Wooden panel	0	11.52	1	0	0	0
5	Caracas	2	Male	2019-06-27	3	Right	Right	Wooden panel	0	15.58	3	0	0	0
5	Caracas	2	Male	2019-06-28	4	Right	Left	Wooden panel	0	0	0	0	0	0
5	Caracas	2	Male	2019-07-01	5	Right	Right	Wooden panel	0	1.99	2	0	0	0
5	Caracas	2	Male	2019-07-02	6	Right	Left	Wooden panel	0	0	0	0	0	0
5	Caracas	2	Male	2019-07-03	7	Right	Right	Wooden panel	0	0	0	0	0	0
5	Caracas	2	Male	2019-07-04	8	Right	Left	Wooden panel	0	0	0	0	0	0
7	Hunter	1	Female	2019-07-02	1	Right	Right	Mirror	0	26.27	5	0	0	0
7	Hunter	1	Female	2019-07-03	2	Right	Left	Mirror	0	0	0	0	0	0
7	Hunter	1	Female	2019-07-04	3	Right	Right	Mirror	0	0	0	0	0	0
7	Hunter	1	Female	2019-07-05	4	Right	Left	Mirror	0	0	0	0	0	0
7	Hunter	1	Female	2019-07-08	5	Right	Right	Mirror	0	0	0	0	0	0
7	Hunter	1	Female	2019-07-09	6	Right	Left	Mirror	0	0	0	0	0	0
7	Hunter	1	Female	2019-07-10	7	Right	Right	Mirror	0	6.5	2	0	0	0
7	Hunter	1	Female	2019-07-11	8	Right	Left	Mirror	0	0	0	0	0	0
7	Hunter	1	Female	2019-07-02	1	Right	Right	Wooden panel	0	3.75	1	0	0	0
7	Hunter	1	Female	2019-07-03	2	Right	Left	Wooden panel	0	0	0	0	0	0
7	Hunter	1	Female	2019-07-04	3	Right	Right	Wooden panel	0	0	0	0	0	0
7	Hunter	1	Female	2019-07-05	4	Right	Left	Wooden panel	0	0	0	0	0	0
7	Hunter	1	Female	2019-07-08	5	Right	Right	Wooden panel	0	0	0	0	0	0
7	Hunter	1	Female	2019-07-09	6	Right	Left	Wooden panel	0	0	0	0	0	0
7	Hunter	1	Female	2019-07-10	7	Right	Right	Wooden panel	0	0	0	0	0	0
7	Hunter	1	Female	2019-07-11	8	Right	Left	Wooden panel	0	0	0	0	0	0

## Sheet: Test3
Fisher’s exact test					Friedman test
ID	Condition	Success			ID	Name	VMirror	HMirror	Vnmirror	HNmirror	SVMirror	SHMirror	SVNmirror	SHNmirror
Romero	VM	Yes			1	Romero	25.8	50.1	39.13	44.04	2	4	1	1
Romero	HM	Yes			2	Hoy	NA	103.09	NA	62.24	NA	5	NA	3
Romero	VW	Yes			3	Lima	NA	15.81	26.31	5.45	NA	2	2	1
Romero	HW	Yes			4	Washington	NA	5.78	33.07	5.45	NA	1	2	1
Hoy	VM	No			5	Caracas	NA	NA	NA	NA	NA	NA	NA	NA
Hoy	HM	Yes			6	Wellington	NA	NA	NA	NA	NA	NA	NA	NA
Hoy	VW	No			7	Hunter	NA	202.75	78.02	44.05	NA	9	4	2
Hoy	HW	Yes			8	Lisbon	NA	NA	93.61	117	NA	NA	5	8
Lima	VM	No
Lima	HM	Yes
Lima	VW	Yes
Lima	HW	Yes
Washington	VM	No
Washington	HM	Yes
Washington	VW	Yes
Washington	HW	Yes
Caracas	VM	No
Caracas	HM	No
Caracas	VW	No
Caracas	HW	No
Wellington	VM	No
Wellington	HM	No
Wellington	VW	No
Wellington	HW	No
Hunter	VM	No
Hunter	HM	Yes
Hunter	VW	Yes
Hunter	HW	Yes
Lisbon	VM	No
Lisbon	HM	No
Lisbon	VW	Yes
Lisbon	HW	Yes
